# Supplementary material for: Genetic Modification of Closely Related Candida Species
Source: Front Microbiol. 2019 Mar 19;10:357. doi: 10.3389/fmicb.2019.00357 (PMC6433835; doi:10.3389/fmicb.2019.00357)
Supplement: Supplementary file 1 [file Table_1.xlsx]

## Sheet: Suplementary Table 1
Supplementary Table 1. Primers used in this study for the generation of strains and plasmids.
Note that primers used for colony PCR verification are not included.
Name	Sequence	Description
EMO001	TTTTTGGTGAAGATTTTTCCCACACCAAATATATACCACTTTTCTTCTAACACCACCTACATATTCACTGGTACCGGGCCCCCCCTCGAG	HIS1 deletion in C. dubliniensis with SAT1 flipper cassette, left primer
EMO002	GATGGTATAAGACAGATTGAGTCAAATTGAAGTAAATCTATAAGTATGTATATATAGTATTTTAGGCGGCCGCTCTAGAACTAGTGGATC	HIS1 deletion in C. dubliniensis with SAT1 flipper cassette, right primer
EMO003	ATCAGCCCCCCTCCCATGAAAAGTTCCCTTTTTCTTCATCTTTTTCTTCTTTAACCATTATTCATTAAAGGTACCGGGCCCCCCCTCGAG	LEU2 deletion in C. dubliniensis with SAT1 flipper cassette, left primer
EMO004	CTCGGTAACTCGGTTATGTGCATATTTAGAGAAGTCTGTCGACTTTGGTGTATTTGAAATCTAAGGCGGCCGCTCTAGAACTAGTGGATC	LEU2 deletion in C. dubliniensis with SAT1 flipper cassette, right primer
EMO005	CTCCAATTCTGAAAAATTTTTCTTCTTCTTCATACTAAACAAAACAACTATAAAGATAATCAATTAATAGGTACCGGGCCCCCCCTCGAG	ARG4 deletion in C. dubliniensis with SAT1 flipper cassette, left primer
EMO006	CATTTCCATAAAAAAAAAAAAAAAAACAAAACAAAACATTGAATACTATATGATTATTTATAAAGGCGGCCGCTCTAGAACTAGTGGATC	ARG4 deletion in C. dubliniensis with SAT1 flipper cassette, right primer
CtHis1(ApaI)	ggagcgGGGCCCacctcaagagatgaatgaca	Cloning of HIS1 5' homology arms in pSFS2A, left primer (ApaI)
CtHis1(XhoI)	gccggcCTCGAGactctaaactatgattgtattc	Cloning of HIS1 5' homology arms in pSFS2A, right primer (XhoI)
CtHis1(SacII)	ggagcgCCGCGGagttcatctgtataatagtaca	Cloning of HIS1 3' homology arms in pSFS2A, left primer (SacII)
CtHis1(SacI)	ggccgcGAGCTCtccacacattcataaatgttca	Cloning of HIS1 3' homology arms in pSFS2A, right primer (SacI)
CtLeu2(ApaI)	ggagcgGGGCCCgtcaagaaagaggtttacgttc	Cloning of LEU2 5' homology arms in pSFS2A, left primer (ApaI)
CtLeu2(XhoI)	gccggcCTCGAGaacggacattgtatagatttgt	Cloning of LEU2 5' homology arms in pSFS2A, right primer (XhoI)
CtLeu2(SacII)	ggagcgCCGCGGgaatcttctgcttaatatgaca	Cloning of LEU2 3' homology arms in pSFS2A, left primer (SacII)
CtLeu2(SacI)	ggccgcGAGCTCgtagacaagaaggatcaaatt	Cloning of LEU2 3' homology arms in pSFS2A, right primer (SacI)
CtArg4(ApaI)	ggagcgGGGCCCtgaatgtgttggtggtgatg	Cloning of ARG4 5' homology arms in pSFS2A, left primer (ApaI)
CtArg4(XhoI)	gccggcCTCGAGgacattgttgttagaataagtt	Cloning of ARG4 5' homology arms in pSFS2A, right primer (XhoI)
CtArg4(NotI)	ggagcgGCGGCCGCacattcattctccttccctctc	Cloning of ARG4 3' homology arms in pSFS2A, left primer (NotI)
CtArg4(SacII)	ggccgcCCGCGGgaatattgattgttgattgttg	Cloning of ARG4 3' homology arms in pSFS2A, right primer (SacII)
EMO234	ggagcgGGGCCCacctcaagagatgaaatgaca	Cloning of HIS1 5' homology arms in pEM008, left primer (ApaI)
EMO235	gccggcCTCGAGactctaaactatgattgtattc	Cloning of HIS1 5' homology arms in pEM008, right primer (XhoI)
EMO236	ggagcgGCGGCCGCagttcatctgtataatagtaca	Cloning of HIS1 3' homology arms in pEM008, left primer (NotI)
EMO237	ggccgcCCGCGGtccacacattcataaatgttca	Cloning of HIS1 3' homology arms in pEM008, right primer (SacII)
EMO238	ggagcgGGGCCCtgaatgtgttggtggtgatg	Cloning of ARG4 5' homology arms in pEM008, left primer (ApaI)
EMO239	gccggcCTCGAGTAAGTTGTTGATAATTAAGCAAAGAAA	Cloning of ARG4 5' homology arms in pEM008, right primer (XhoI)
EMO240	ggagcgGCGGCCGCacattcattctccttccctctc	Cloning of ARG4 3' homology arms in pEM008, left primer (NotI)
EMO241	ggccgcCCGCGGgaatattgattgttgattgttg	Cloning of ARG4 3' homology arms in pEM008, right primer (SacII)
EMO031	GGTGTCAAATGTGCCACTGT	Amplification of C. albicans HIS1 gene for TOPO cloning
EMO032	TTTAAATGCACACAACTTAATAGCA	Amplification of C. albicans HIS1 gene for TOPO cloning
EMO033	TTATGGCCGTCAATAATGAAA	Amplification of C. albicans LEU2 gene for TOPO cloning
EMO034	TGTTGATGTTTCCAATTTATTCAA	Amplification of C. albicans LEU2 gene for TOPO cloning
EMO035	TGAATCGATGCTTTCTTTACTGC	Amplification of C. albicans ARG4 gene for TOPO cloning
EMO036	GAATGTGAATATTATTGATGTGAGGAA	Amplification of C. albicans ARG4 gene for TOPO cloning
EMO254	tgccacctgacgtcgtatag	Amplification of the HYG marker from pYM70 for cloning in TOPO vector
EMO255	tcttagacgtcattttatgatgga	Amplification of the HYG marker from pYM70 for cloning in TOPO vector
EMO256	tcatcccattcattccatca	Amplification of the Nat marker from pSFS2A for cloning in TOPO vector
EMO257	ctgcaggaccacctttgatt	Amplification of the Nat marker from pSFS2A for cloning in TOPO vector
EMO126	ccgctgctaggcgcgccgtgCCAGTGTGATGGATATCTGC	Universal left primer to amplify the nutritional or drug-resistance markers
EMO622	gcagggatgcggccgctgacAGCTCGGATCCACTAGTAACG	Universal right primer to amplify the nutritional or drug-resistance markers
EMO097	CCCAAATGGATATGGGGTTA	Amplification of C. dubliniensis HIS1 5' flank for integration of the HIS1 marker, right primer
EMO098	cacggcgcgcctagcagcggTGGTGTGGGAAAAATCTTCA	Amplification of C. dubliniensis HIS1 5' flank for integration of the HIS1 marker, left primer
EMO099	gtcagcggccgcatccctgcCAATTTGACTCAATCTGTCTTATACCA	Amplification of C. dubliniensis HIS1 3' flank for integration of the HIS1 marker, right primer
EMO100	TTATCCCCAAAAGCAACAGC	Amplification of C. dubliniensis HIS1 3' flank for integration of the HIS1 marker, left primer
EMO104	GGCGCATTCTTCAATTAGATTT	Amplification of C. dubliniensis LEU2 5' flank for integration of the LEU2 marker, right primer
EMO105	cacggcgcgcctagcagcggAAGAAAAAGGGAACTTTTCATGG	Amplification of C. dubliniensis LEU2 5' flank for integration of the LEU2 marker, left primer
EMO106	gtcagcggccgcatccctgcCACCAAAGTCGACAGACTTCTC	Amplification of C. dubliniensis LEU2 3' flank for integration of the LEU2 marker, right primer
EMO107	CAACAAAGCCTACCATTAGAGC	Amplification of C. dubliniensis LEU2 3' flank for integration of the LEU2 marker, left primer
EMO111	TTGGACAGAAAGCTGTCACATT	Amplification of C. dubliniensis ARG4 5' flank for integration of the ARG4 marker, right primer
EMO112	cacggcgcgcctagcagcggTGTTTTGTTTAGTATGAAGAAGAAGAA	Amplification of C. dubliniensis ARG4 5' flank for integration of the ARG4 marker, left primer
EMO113	gtcagcggccgcatccctgcAATAGAAAGATACCCTGTATTCCATTG	Amplification of C. dubliniensis ARG4 3' flank for integration of the ARG4 marker, right primer
EMO114	TGTACTTGGCCCGTGATACC	Amplification of C. dubliniensis ARG4 3' flank for integration of the ARG4 marker, left primer
EMO176	CTTTTTATATATTCTTCAAACAAAACTATTAATTatgccacaatttgatatattatgtaaaac	Amplification of the pSFS2A fragment to clone the C. tropicalis MAL2 promoter in pSFS2A, left primer
EMO177	acaatatcagtgatatcagattgatg	Amplification of the pSFS2A fragment to clone the MAL2 and PCK1 promoters in pSFS2A, right primer
EMO178	TTATATTTggatccGTTAAAAGCCCTGTATACCGAAT	Amplification of the C. tropicalis MAL2 promoter for cloning in pSFS2A, right primer
EMO179	AATTAATAGTTTTGTTTGAAGAATATATAAAAAG	Amplification of the C. tropicalis MAL2 promoter for cloning in pSFS2A, left primer
EMO197	GTTTAGggatccGTGTGTGTATTCTGTATAATTTGTAAAC	Amplification of the C. tropicalis PCK1 promoter for cloning in pSFS2A, right primer
EMO210	ATTGAATAATTATTTAAACTTGGTTG	Amplification of the C. tropicalis PCK1 promoter for cloning in pSFS2A, left primer
EMO211	CAACCAAGTTTAAATAATTATTCAATatgccacaatttgatatattatgtaaaac	Amplification of the pSFS2A fragment to clone the C. tropicalis PCK1 promoter in pSFS2A, left primer
EMO242	GTTTAGggatccAATATATGCGAGTCTTTTTTTTCCAG	Amplification of the C. albicans PCK1 promoter for cloning in pSFS2A, right primer
EMO243	GATTGATAATTATTTGAATAAGTTAATGATTG	Amplification of the C. albicans PCK1 promoter for cloning in pSFS2A, left primer
EMO244	CAATCATTAACTTATTCAAATAATTATCAATCatgccacaatttgatatattatgtaaaa	Amplification of the pSFS2A fragment to clone the C. albicans PCK1 promoter in pSFS2A, left primer
EMO249	ccctcgagcggatccccggg	5' primer to amplify the Myc13 epitope with linker from pADH34 to clone it in pEM008 and pEM010
EMO250	tcattattggatccgaagttcc	3' primer to amplify the Myc13 epitope with linker from pADH34 to clone it in pEM008 and pEM010
EMO500	CAATTGAATGGAGTGGTCATTG	Amplification of C. tropicalis LEU2 5' flank for integration of the LEU2 marker, right primer
EMO501	cacggcgcgcctagcagcggGAAAAAGATTTCCGGGAGGT	Amplification of C. tropicalis LEU2 5' flank for integration of the LEU2 marker, left primer
EMO502	gtcagcggccgcatccctgcTGAATTTCATGTGTGCATTAATAAGA	Amplification of C. tropicalis LEU2 3' flank for integration of the LEU2 marker, right primer
EMO503	TCTTGGTGGTGGTGATGATG	Amplification of C. tropicalis LEU2 3' flank for integration of the LEU2 marker, left primer
EMO623	CGGATCCCCGGGTTAATTAACGG	5' primer to amplify the 13x MYC cassette for gene tagging
EMO624	GGCGGCCGCTCTAGAACTAGTGGATC	3' primer to amplify the 13x MYC cassette for gene tagging
CtEfg1-mNeonGreen long oligo fwd	CAAGGACAACCAAACCAGCAAGCACCTACTCAATCACCAGTTCAATCTAACAATAGTGGTGTGAAAGAAGAAAAAGGTGGTAGTGGTATGGTTTCTAAAG	5' primer to amplify the fluorophore cassettes to tag EFG1 in C. tropicalis
CtEfg1-mNeonGreen long oligo rev	AATACGAAAAATTGCAATAGATCCACACTCCTTCTAGAAATGTTGCAAACAACACATTCATTCTGGAATAATAGggcggccgctctagaactagtggatc	3' primer to amplify the fluorophore cassettes to tag EFG1 in C. tropicalis
CtWor1-mNeonGreen long oligo fwd	ggtacaaccggggtaactacaggtgacgaatctggtggtaatacatcaactggtccatattacaccactgcaaatGGTGGTAGTGGTATGGTTTCTAAAG	5' primer to amplify the fluorophore cassettes to tag WOR1 in C. tropicalis
CtWor1-mNeonGreen long oligo rev	tcacactatatattataacgtcattatatctaaatctctcacattatcagttgttcatcaatacgaaaacaaaaggcggccgctctagaactagtggatc	3' primer to amplify the fluorophore cassettes to tag WOR1 in C. tropicalis
